# Supplementary material
Source: HighWire-hosted journal article supplement (https://qdcxjkg.com/highwire/filestream/113747/field_highwire_adjunct_files/1/Simonneau_et_al___resubmision_ERJ_supplementary_tables.pdf)
Supplement: Simonneau_et_al___resubmision_ERJ_supplementary_tables.pdf [file Simonneau_et_al___resubmision_ERJ_supplementary_tables.pdf]

**Supplementary Table 1. Baseline, Week 17 and change from baseline to Week 17 in pulmonary vascular resistance (per protocol and all-treated set)**

|                                                                                                                                                       | Mean values $\pm$ SD<br>at baseline |                      | Mean values $\pm$ SD<br>at Week 17 |                      | Mean change $\pm$ SD<br>from baseline to<br>Week 17 |                       | Treatment<br>effect*<br>[95% CL;<br>Wilcoxon <i>P</i> -<br>value] |
|-------------------------------------------------------------------------------------------------------------------------------------------------------|-------------------------------------|----------------------|------------------------------------|----------------------|-----------------------------------------------------|-----------------------|-------------------------------------------------------------------|
|                                                                                                                                                       | Placebo                             | Selexipag            | Placebo                            | Selexipag            | Placebo                                             | Selexipag             |                                                                   |
| Per protocol set                                                                                                                                      |                                     |                      |                                    |                      |                                                     |                       |                                                                   |
| N                                                                                                                                                     | 6                                   | 29                   | 6                                  | 29                   | 6                                                   | 29                    |                                                                   |
| Pulmonary vascular<br>resistance, dyn $\cdot$ s $\cdot$<br>cm <sup>-5</sup>                                                                           | 826.8 $\pm$ 195.8                   | 951.9 $\pm$ 434.5    | 964.0 $\pm$ 247.9                  | 783.8 $\pm$ 393.2    | 137.2 $\pm$<br>84.9                                 | -168.1 $\pm$<br>241.6 | -30.3%<br>[-44.7,<br>-12.2;<br>0.0045]                            |
| All-treated set                                                                                                                                       |                                     |                      |                                    |                      |                                                     |                       |                                                                   |
| N                                                                                                                                                     | 10                                  | 32                   | 10                                 | 32                   | 10                                                  | 32                    |                                                                   |
| Pulmonary vascular<br>resistance, dyn $\cdot$ s $\cdot$<br>cm <sup>-5</sup>                                                                           | 867.2 $\pm$<br>379.3                | 948.6 $\pm$<br>428.0 | 1090.8 $\pm$<br>421.3              | 818.8 $\pm$<br>416.9 | 223.6 $\pm$<br>355.4                                | -129.8 $\pm$<br>309.7 | -33.0%<br>[-47.0,<br>-15.2;<br>0.0022]                            |
| *Treatment effect calculated at Week 17 as the change in the geometric mean expressed as a percentage of the baseline value<br>SD; standard deviation |                                     |                      |                                    |                      |                                                     |                       |                                                                   |

**Supplementary Table 2. Serious adverse events during the study (safety set)**

| <b>Serious adverse events</b>  | <b>Placebo</b> | <b>Selexipag</b> |
|--------------------------------|----------------|------------------|
|                                | <b>n=10</b>    | <b>n=33</b>      |
| Patients with $\geq 1$ serious |                |                  |
| adverse event, n               | 4              | 6                |
| Total number of serious        | 10             | 13               |
| adverse events                 |                |                  |
| Headache                       | -              | 2                |
| Pulmonary arterial             | 2              | 1                |
| hypertension                   |                |                  |
| Dyspnoea                       | 1              | 1                |
| Chest pain                     | -              | 1                |
| Myalgia                        | -              | 1                |
| Nasopharyngitis                | -              | 1                |
| Nausea                         | -              | 1                |
| Oral papilloma                 | -              | 1                |
| Psychotic disorder             | -              | 1                |
| Sciatica                       | -              | 1                |
| Urinary tract infection        | -              | 1                |
| Vomiting                       | -              | 1                |
| Alcohol interaction            | 1              | -                |
| Benign prostatic hyperplasia   | 1              | -                |
| Cardiac failure                | 1              | -                |

|                                          |    |   |
|------------------------------------------|----|---|
| Cataract operation                       | 1  | - |
| Chronic obstructive<br>pulmonary disease | 1) | - |
| Respiratory infection                    | 1  | - |
| Urinary retention                        | 1  | - |

---

**Supplementary Table 3. Prevalence of selected treatment-emergent adverse events over time in selexipag-treated patients**

| <b>Adverse events<br/>(AE) *</b>                                | <b>≥0–27 days<br/>(n=33)</b> | <b>≥28–55<br/>days<br/>(n=32)</b> | <b>≥56–83<br/>days<br/>(n=32)</b> | <b>≥84 days<br/>(n=31)</b> |
|-----------------------------------------------------------------|------------------------------|-----------------------------------|-----------------------------------|----------------------------|
| Patients with ≥1 AE, n                                          | 26 (78.8)                    | 24 (75.0)                         | 22 (68.8)                         | 21 (67.7)                  |
| (%)                                                             |                              |                                   |                                   |                            |
| Different AEs, n                                                | 56                           | 47                                | 43                                | 34                         |
| AE, n (%)                                                       |                              |                                   |                                   |                            |
| Headache                                                        | 21 (63.6)                    | 16 (50.0)                         | 16 (50.0)                         | 14 (45.2)                  |
| Pain in extremity                                               | 10 (30.3)                    | 9 (28.1)                          | 9 (28.1)                          | 4 (12.9)                   |
| Pain in jaw                                                     | 8 (24.2)                     | 8 (25.0)                          | 6 (18.8)                          | 6 (19.4)                   |
| Nausea                                                          | 8 (24.2)                     | 6 (18.8)                          | 5 (15.6)                          | 4 (12.9)                   |
| Flushing                                                        | 4 (12.1)                     | 4 (12.5)                          | 4 (12.5)                          | 4 (12.9)                   |
| Diarrhoea                                                       | 5 (15.2)                     | 4 (12.5)                          | 3 (9.4)                           | 2 (6.5)                    |
| *Adverse events commonly associated with prostacyclin analogues |                              |                                   |                                   |                            |
